# Supplementary material for: Hospital Utilization Among Rural Children Served by Pediatric Neurology Telemedicine Clinics
Source: PubMed Central journal article supplement (PMC6704740; doi:10.1001/jamanetworkopen.2019.9364), 2019-08-16
Supplement: jamanetwopen-2-e199364-s001.pdf [file jamanetwopen-2-e199364-s001.pdf]

## Supplementary Online Content

Dayal P, Chang CH, Benko WS, et al. Hospital utilization among rural children served by pediatric neurology telemedicine clinics. *JAMA Netw Open*. 2019;2(8):e199364. doi:10.1001/jamanetworkopen.2019.9364

**eTable 1.** Comparison of Diagnosis Categories Among Neurological Hospital Encounters

**eTable 2.** Sensitivity Analysis Excluding 39 Patients Who Had Both Telemedicine and In-Person Neurology Appointments

**eTable 3.** Comparison of Hospital Encounter Frequencies and Rates in Matched Telemedicine and In-Person Patient Cohorts

This supplementary material has been provided by the authors to give readers additional information about their work.

eTable 1. Comparison of Diagnosis Categories Among Neurological Hospital Encounters<sup>a</sup>

| Neurological Diagnosis Category                                                          | Total, N (%) | Telemedicine cohort, N (%) | In-person cohort, N (%) |
|------------------------------------------------------------------------------------------|--------------|----------------------------|-------------------------|
| Seizures and suspected seizures                                                          | 768 (48.6)   | 29 (59.2)                  | 739 (48.3)              |
| Developmental delays and behavioral/mental/social disorders                              | 190 (12.0)   | 7 (14.3)                   | 183 (12.0)              |
| Other low-severity <sup>b</sup>                                                          | 178 (11.3)   | 3 (6.1)                    | 175 (11.4)              |
| Disorders affecting the muscle and nerves, including movement disorders                  | 150 (9.5)    | 5 (10.2)                   | 145 (9.5)               |
| Cerebral degeneration and inflammation, spinal cord inflammation & other brain disorders | 121 (7.7)    | 2 (4.1)                    | 119 (7.8)               |
| Headaches and migraines                                                                  | 99 (6.3)     | 2 (4.1)                    | 97 (6.3)                |
| Intracranial/cerebral/spinal cord injury or damage                                       | 74 (4.7)     | 1 (2.0)                    | 73 (4.8)                |
| Total                                                                                    | 1,580 (100)  | 49 (100)                   | 1,531 (100)             |

<sup>a</sup>Overall p=0.60

<sup>b</sup>Including eye, ear, sleep, head & neck, neuroendocrine, metabolic, nutritional, neoplasm, device-related complications and genetic/congenital disorders

eTable 2. Sensitivity Analysis Excluding 39 Patients Who Had Both Telemedicine and In-Person Neurology Appointments

| Statistic                                                      | Telemedicine<br>(N=339) | In-person<br>(N=3,791) |
|----------------------------------------------------------------|-------------------------|------------------------|
| Hospital encounter rate ratio <sup>a</sup> (95% CI)            |                         |                        |
| All-cause encounters                                           | 0.18 (0.12-0.28)        | REF                    |
| Neurological encounters                                        | 0.22 (0.13-0.37)        | REF                    |
| Adjusted hospital encounter rate ratio <sup>a,b</sup> (95% CI) |                         |                        |
| All-cause encounters                                           | 0.42 (0.26-0.68)        | REF                    |
| Neurological encounters                                        | 0.37 (0.21-0.68)        | REF                    |

<sup>a</sup>Incident Rate Ratio (IRR) from negative binomial regression with patient's time in the study (years) as an offset

<sup>b</sup>Adjusted for insurance status, median household income, travel time to UCDCH, presence of a complex chronic condition and neurology clinic diagnosis category (similar to Table 4)

eTable 3. Comparison of Hospital Encounter Frequencies and Rates in Matched Telemedicine and In-Person Patient Cohorts

| Statistic                                                    | Matched factor                        |                   |                                                               |                   |
|--------------------------------------------------------------|---------------------------------------|-------------------|---------------------------------------------------------------|-------------------|
|                                                              | Time to UCDCH in minutes <sup>a</sup> |                   | Time to Outpatient Neurology Clinic in minutes <sup>b,c</sup> |                   |
|                                                              | Telemedicine (N=187)                  | In-person (N=187) | Telemedicine (N=378)                                          | In-person (N=378) |
| All-cause encounters, N                                      | 52                                    | 53                | 68                                                            | 369               |
| Neurological encounters, N                                   | 34                                    | 29                | 47                                                            | 211               |
| Total person-years in cohort, mean (SD)                      | 744.3 (31.1)                          | 598.2 (37.7)      | 1,341.8 (42.2)                                                | 1,801.2 (51.4)    |
| Hospital encounter rate ratio (95% CI)                       |                                       |                   |                                                               |                   |
| All-cause encounters                                         | 0.59 (0.27-1.29)                      | REF               | 0.22 (0.13-0.37)                                              | REF               |
| Neurological encounters                                      | 0.70 (0.31-1.55)                      | REF               | 0.26 (0.14-0.47)                                              | REF               |
| Adjusted hospital encounter rate ratio <sup>d</sup> (95% CI) |                                       |                   |                                                               |                   |
| All-cause encounters                                         | 0.58 (0.26-1.30)                      | REF               | 0.19 (0.04-0.83)                                              | REF               |
| Neurological encounters                                      | 0.79 (0.33-1.92)                      | REF               | 0.14 (0.02-0.82)                                              | REF               |

<sup>a</sup>Mean travel time to UCDCH (minutes): telemedicine cohort=153.4 (SD 46.7), in-person cohort=153.4 (SD 47.2)

<sup>b</sup>Mean travel time to neurology clinic (minutes): telemedicine cohort=20.6 (SD 24.4), in-person cohort=23.5 (SD 23.1)

<sup>c</sup>Inpatient admissions only

<sup>d</sup>Adjusted for insurance status, median household income, travel time to UCDCH (for time to neurology clinic-matched sample only), presence of a complex chronic condition and neurology clinic diagnosis category.
